# Supplementary material
Source: ML conference proceedings conference paper supplement (https://openreview.net/forum?id=QI6HrBseVF)

Input: Video, Flow, Point Tracks

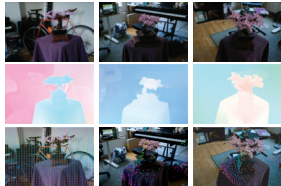

Gradient-Descent Optimize

Poses, Intrinsic and Dense Depth

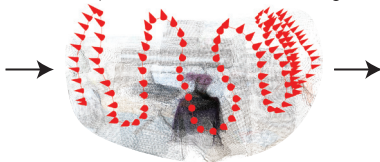

Optimize Gaussian Splat

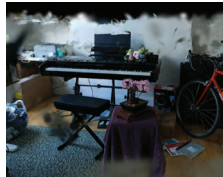

Supplement: supplementary_material [file attachment]
